# Supplementary material for: Engineering a sustainable cadmium sulfide/polyethyleneimine-functionalized biochar/chitosan composite for effective chromium adsorption: optimization, co-interfering anions, and mechanisms
Source: Royal Society of Chemistry journal article supplement (doi:10.1039/d4ra03479a), 2024-01-01
Supplement: d4ra03479a1.pdf [file d4ra03479a1.pdf]

# Engineering a Sustainable cadmium sulfide/polyethyleneimine-functionalized biochar/chitosan Composite for Effective Chromium Adsorption: optimization, co-interfering anions, and mechanism

Abdelazeem S. Eltaweil <sup>1,2</sup>, Nouf Al Harby <sup>3,\*</sup>, Mervette El Batouti <sup>2</sup> and Eman M. Abd El-Monaem <sup>2</sup>

<sup>1</sup> Department of Engineering, College of Engineering and Technology, University of Technology and Applied Sciences, Sultanate of Oman, (A.S.E)  
(abdelazeemeltaweil@alexu.edu.eg)

<sup>2</sup> Department of Chemistry, Faculty of Science, Alexandria University 21934, Alexandria, Egypt, (E.M.A) (emanabdelmonaem5925@yahoo.com), (M.E.) (Mervette.elbatouti@alexu.edu.eg).

<sup>3</sup> Department of Chemistry, College of Science, Qassim University, Buraidah 51452, Saudi Arabia (N.F.A.) (hrbien@qu.edu.sa).

\* Correspondence: N.F.A. (hrbien@qu.edu.sa).

**Table S1.** Non-linear equations of the applied adsorption isotherm models.

| <b>Model</b>      | <b>Equation</b>                                       |
|-------------------|-------------------------------------------------------|
| <b>Langmuir</b>   | $q_e = \frac{q_{max} K_L C_e}{1 + K_L C_e} \quad (1)$ |
| <b>Freundlich</b> | $q_e = k_F C_e^{1/n} \quad (2)$                       |
| <b>Temkin</b>     | $q_e = \frac{R T}{b_T} \ln k_T C_e \quad (3)$         |

Where,  $q_e$  and  $C_e$  are the adsorption capacity and the concentration of the un-adsorbed Pb(II) at equilibrium, respectively.  $q_{max}$  and  $k_L$  are the monolayer adsorption capacity and Langmuir constant, respectively.  $n$  and  $k_F$  are Freundlich constants.  $k_T$  is the equilibrium binding constant and  $b$  is Temkin constant related to heat of adsorption.

**Table S2.** Non-linear equations of the applied adsorption kinetic models.

| <b>Kinetic Model</b> | <b>Equation</b>                                           |
|----------------------|-----------------------------------------------------------|
| <b>PFO</b>           | $q_t = q_e(1 - e^{-k_1 t}) \quad (4)$                     |
| <b>PSO</b>           | $q_t = \frac{t k_2 q_e^2}{1 + t k_2 q_e} \quad (5)$       |
| <b>Elovich model</b> | $q_t = \frac{1}{\beta} \ln(\alpha \beta t + 1) \quad (6)$ |

Where,  $q_t$  and  $q_e$  are adsorbed amounts of  $\text{Cr}^{\text{VI}}$  at time  $t$  and equilibrium, respectively.  $k_1$  and  $k_2$  are the rate constants of PFO and PSO, respectively. Furthermore,  $\alpha$  and  $\beta$  are Elovich coefficients that represent the initial adsorption rate and the desorption coefficient, respectively, also related to the extent of surface coverage and activation energy for chemisorption.
